# Supplementary material for: Needs and barriers around affective-sexual and gender diversity: are the system and institutions up to the task?
Source: Research Square preprint supplement (doi:10.21203/rs.3.rs-7766378/v1), 2025-10-17
Supplement: Supplementary file 1 [file f7a07d835267a871efc0459f.docx]

All Text for Table 1 (135 words):

Table 1 contains four columns with the following headings: Dimensions, Categories, Subcategories, and Division within Subcategories (Codes). The first and only dimension is “*Causes*”, which is further divided into two categories: “*Limitations Based on Prejudices*” and “*Management Limitations/Implementation*”.

The first category, “*Limitations Based on Prejudices*”, refers to beliefs, emotions, and behaviors. The subcategory *“Beliefs*” is divided into the following codes: Ideological, political, religious, etc., legitimation; Convergence of intersectional risk factors; Patriarchal-heteronormative society. The subcategory *“Emotions”* includes the following codes: Disgust; Fear of the unknown; Pathologization. The subcategory “*Behaviors”* includes the following codes: Ridicule; Resistance or objections (despite the law); Deterrence; Normalization of violence; Physical and pharmacological violence, etc.

The second category, “*Management Limitations/Implementation”*, is broken down into the subcategory “*Functioning*”. The subcategory “*Functioning*” is further divided into the following codes:vResources and instruments; Awareness and training.

Alt Text for Figure 1 (108 words):

Figure 1 illustrates the main ideas, concepts, and relationships derived from the findings on the Social Rejection of LGBTI people. These relationships are represented through connecting arrows that indicate how each idea manifests in or influences others. Additionally, the figure indicates the frequency with which each idea or concept appears in participants’ narratives. Specifically, Figure 1 depicts how social rejection is manifested both in the private sphere and the public sphere—the latter being frequently identified by participants as a key theme. With regard to the public sphere, the figure highlights that it is through institutions themselves and prevailing social norms that social rejection is perpetuated and projected.

Alt Text for Figure 2 (86 words):

Figure 2 represents a conceptual map illustrating the main ideas, concepts, and relationships identified in the analysis of institutional discrimination. The arrows represent the directionality and interaction among key concepts, while the size and prominence of each item reflect its relative frequency and significance in participant discourse. At the center of the map, discriminatory behaviors are highlighted as a central theme—behaviors that arise from gaps in laws and regulations. These behaviors are manifested in the form of secondary victimization, ridiculing, and physical and pharmacological violence.

Alt Text for Figure 3a (71 words):

Figure 3a illustrates the key elements, interconnections, and thematic frequency related to belief systems that underpin discrimination against LGBTIQA+ individuals. The most frequently cited beliefs—emphasized through connecting arrows—include the notion of a heteronormative and patriarchal society and ideological, political, and religious belief systems that legitimize discrimination. Less frequently mentioned, though still significant, are themes such as the convergence of intersectional risk factors, misinformation, and, finally, the pathologization of diversity.

Alt Text for Figure 3b (48 words):

Figure 3b represents the elements underlying discriminatory behaviors influenced by emotions. From this central idea, four connecting arrows branch out, indicating the types of emotions most frequently mentioned in participants’ narratives: Fear of the unknown; Disgust; Affection (expressed as paternalism), and Impossibility (as a lack of emotional response).
